# Supplementary material
Source: Springer Nature journal article supplement (https://www.springermedizin.de/resource/supplementary/12985_2010_1073_MOESM7_ESM.pdf/9609082)
Supplement: MOESM7 [file 9609082]

1 50 100

DENV-3/VE/BID-V2179/2000 (A) MRCVGVGNRDFVEGLSGATWVDVVLEHGGCVTTMAKNKPTLDIELQKTEATQLATLRKLCIEGKITNITTD SRCPTQGEAVLPEEQDQNYVCKHTYVDRG

DENV-3/VE/BID-V911/2001 (B) -----

DENV-3/VE/BID-V1593/2005 (C) -----I-----A-----

101 150 200

DENV-3/VE/BID-V2179/2000 (A) WNGGCGLFGKGS LVTCAKFQCLEPIEGKV VQYENLKYTVII TVHTGDQH QVGNETQGV TAEITPQAST TEAILPEYGT LGLECS PRTGLDFNEMILL TMK

DENV-3/VE/BID-V911/2001 (B) -----

DENV-3/VE/BID-V1593/2005 (C) -----H-----

201 250 300

DENV-3/VE/BID-V2179/2000 (A) NKAWMVHRQWFFDLPLPWTSGATTETPTWNRKELLVTFKNAHAKKQEVVVLGSQEGAMHTALTGATEIQNSGGT SIFAGHLKCR LKMDKLEL KGMSYAMC

DENV-3/VE/BID-V911/2001 (B) -----

DENV-3/VE/BID-V1593/2005 (C) -----

301 350 394

DENV-3/VE/BID-V2179/2000 (A) TNTFVLKKEVSETQHGTILIKVEYKGEDVPCKIPFSTEDGQGKAHNGRLITANPVVTKKEEPVNIEAEPFPGESNIVIGIGDNALKINWYKKGS

DENV-3/VE/BID-V911/2001 (B) -----A-----S-----

DENV-3/VE/BID-V1593/2005 (C) -----A-----
